# Supplementary material for: Temperature Effects on the Crystalline Structure of iPP Containing Different Solvent-Treated TMB-5 Nucleating Agents
Source: MDPI journal article supplement (doi:10.3390/polym15030514), 2023-01-18
Supplement: s1 [file s1]

## Supplementary Materials

### Temperature Effects on the Crystalline Structure of iPP Containing Different Solvent-treated TMB-5 Nucleating Agents

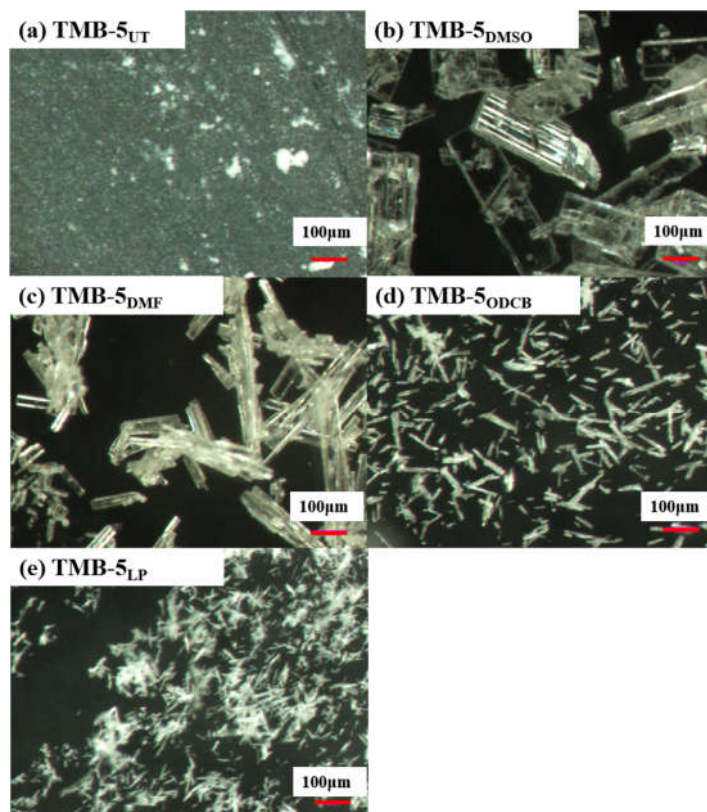

**Figure S1.** Optical microscopic pictures of the five solvent treated TMB-5 nucleating agents (NAs) which were used as the  $\beta$ -NA of iPP in present work. (a) untreated TMB-5 (TMB-5<sub>UT</sub>), (b) dimethylsulfoxide treated TMB-5 (TMB-5<sub>DMSO</sub>), (c) dimethyl formamide treated TMB-5 (TMB-5<sub>DMF</sub>), (d) ortho-dichlorobenzene treated TMB-5 (TMB-5<sub>ODCB</sub>), and (e) liquid paraffin treated TMB-5 (TMB-5<sub>LP</sub>).
